# Supplementary material for: Adoption of Artificial Intelligence in Drinking Water Operations: A Survey of Progress in the United States
Source: Atypon-hosted journal article supplement (doi:10.1061/jwrmd5.wreng-5870), 2023-05-12
Supplement: supplemental materials_jwrmd5.wreng-5870_rapp.pdf [file supplemental%20materials_jwrmd5.wreng-5870_rapp.pdf]

## SUPPLEMENTAL MATERIALS

*ASCE Journal of Water Resources Planning and Management*

# Adoption of Artificial Intelligence in Drinking Water Operations: A Survey of Progress in the United States

Alyson H. Rapp, Annelise M. Capener, and Robert B. Sowby

**DOI:** 10.1061/JWRMD5.WRENG-5870

© ASCE 2023

[www.ascelibrary.org](http://www.ascelibrary.org)

## Protocol S1: Survey Instrument

### How Do Large Community Water Systems Use Artificial Intelligence?

---

Artificial intelligence (AI) is a set of technologies (including machine learning) that can go beyond SCADA to learn a water system's patterns, predict future conditions, and/or recommend particular actions to optimize treatment or distribution operations. This survey is being conducted on large community water systems in the United States to understand their use of AI.

No personal or specific facility information is being collected and your responses will remain anonymous.

- I have read the above statement and agree to take the survey
- I do not agree to take the survey

*Skip To: End of Survey If Artificial intelligence (AI) is a set of technologies (including machine learning) that can go be... = I do not agree to take the survey*

---

*Display This Question:*

*If Artificial intelligence (AI) is a set of technologies (including machine learning) that can go be... = I have read the above statement and agree to take the survey*

Q3 What is the name of your water system?

(This information is only used to ensure legitimate responses and will not be published or associated with your answers.)

---

*Display This Question:*

*If If What is the name of your water system?(This information is only used to ensure legitimate responses and will not be published or associated with your answers.) Text Response Is Displayed*

Q4 Have you in the past, or do you currently use, **some form of AI** in your water system's operations?

- Yes
  - No
  - Not sure
-

**Protocol S1: Survey Instrument (continued)**

*Display This Question:*

*If Have you in the past, or do you currently use, some form of AI in your water system's operations? = No  
Or Have you in the past, or do you currently use, some form of AI in your water system's operations? = Not sure*

Q5 If no or not sure, do you **plan to** in next 5 years?

- Yes
- Maybe
- No

*Display This Question:*

*If Have you in the past, or do you currently use, some form of AI in your water system's operations? = Yes  
Or Have you in the past, or do you currently use, some form of AI in your water system's operations? = Not sure*

Q8 At **what stage** is your use of AI?

- We have never experimented with predictions and training models.
- We have experimented with predictions and training models.
- We have manually used AI models for analyses.
- We have partially integrated AI models into our system.
- We have fully integrated AI models into our system.
- Other: \_\_\_\_\_

*Display This Question:*

*If Have you in the past, or do you currently use, some form of AI in your water system's operations? = Yes*

Q9 **How long** have you used AI in your water system?

- Less than 2 years
- 2-5 years
- More than 5 years
- Not sure

**Protocol S1: Survey Instrument (continued)**

*Display This Question:*

*If Have you in the past, or do you currently use, some form of AI in your water system's operations? = Yes*

**Q10 What** do you use AI for? Select all that apply.

Prediction

Optimization

Other: \_\_\_\_\_

*Display This Question:*

*If Have you in the past, or do you currently use, some form of AI in your water system's operations? = Yes*

*Or If no or not sure, do you plan to in next 5 years? = Yes*

*Or If no or not sure, do you plan to in next 5 years? = Maybe*

**Q11 Please explain** your response to the previous question.

\_\_\_\_\_

*Display This Question:*

*If Have you in the past, or do you currently use, some form of AI in your water system's operations? = Yes*

*Or If no or not sure, do you plan to in next 5 years? = Yes*

*Or If no or not sure, do you plan to in next 5 years? = Maybe*

**Q12 What area** of the system do you use or plan to use it for? Select all that apply.

Treatment

Distribution

Other: \_\_\_\_\_

**Protocol S1: Survey Instrument (continued)**

*Display This Question:*

*If Have you in the past, or do you currently use, some form of AI in your water system's operations? = Yes  
Or If no or not sure, do you plan to in next 5 years? = Yes  
Or If no or not sure, do you plan to in next 5 years? = Maybe*

Q13 Describe your **motivations** for using or planning to use AI. Select **up to 3**.

- Improve water quality
- Improve hydraulics
- Save money
- Automate complex system
- Save energy
- Save time/labor
- Integrate with other technologies
- Improve public perception
- Enhance water conservation
- Detect leaks
- Other: \_\_\_\_\_

*Display This Question:*

*If Have you in the past, or do you currently use, some form of AI in your water system's operations? = Yes  
Or If no or not sure, do you plan to in next 5 years? = Yes  
Or If no or not sure, do you plan to in next 5 years? = Maybe*

Q14 Please explain your response to the previous question.

\_\_\_\_\_

**Protocol S1: Survey Instrument (continued)**

*Display This Question:*

*If Have you in the past, or do you currently use, some form of AI in your water system's operations? = Yes*

Q15 Please select the **benefits** you have seen from using AI in your water system. Select **up to 3**.

- Improve water quality
- Improve hydraulics
- Save money
- Automate complex system
- Save energy
- Save time/labor
- Integrate with other technologies
- Improve public perception
- Enhance water conservation
- Detect leaks
- Other: \_\_\_\_\_

---

*Display This Question:*

*If If no or not sure, do you plan to in next 5 years? = Yes  
Or If no or not sure, do you plan to in next 5 years? = Maybe  
Or If no or not sure, do you plan to in next 5 years? = No*

**Protocol S1: Survey Instrument (continued)**

Q22 Please select the **benefits** you would like to see from using AI in your water system. Select **up to 3**.

- Improve water quality
- Improve hydraulics
- Save money
- Automate complex system
- Save energy
- Save time/labor
- Integrate with other technologies
- Improve public perception
- Enhance water conservation
- Detect leaks
- Other: \_\_\_\_\_

---

Q21 Please explain why you picked your **top 3** benefits.

---

---

*Display This Question:*

*If Have you in the past, or do you currently use, some form of AI in your water system's operations? = No  
Or Have you in the past, or do you currently use, some form of AI in your water system's operations? = Not sure  
Or Have you in the past, or do you currently use, some form of AI in your water system's operations? = Yes  
Or If no or not sure, do you plan to in next 5 years? = Yes  
Or If no or not sure, do you plan to in next 5 years? = Maybe  
Or If no or not sure, do you plan to in next 5 years? = No*

**Protocol S1: Survey Instrument (continued)**

Q19 What are the barriers that you have seen or are preventing you from currently using AI in your system? Select **up to 3**.

- Funding - Not having the money to commit to AI projects
- Payback - Uncertainty about return on investment, or long payback time for investment in AI
- Data Availability - Not having enough data to make AI meaningful.
- Data Quality - Not having access to the right kind of data to make AI meaningful.
- Personnel/Skills - Not having staff or consultants who know how to use or manage AI.
- Scalability/Repeatability - Not being able to advance from one-time AI experiments to full-scale, ongoing integration.
- Prefer to use other technology
- Other: \_\_\_\_\_

---

Q20 Please explain why you picked your **top 3** barriers.

\_\_\_\_\_

*Display This Question:*

*If Have you in the past, or do you currently use, some form of AI in your water system's operations? = Yes  
Or Have you in the past, or do you currently use, some form of AI in your water system's operations? = No  
Or Have you in the past, or do you currently use, some form of AI in your water system's operations? = Not sure  
Or If no or not sure, do you plan to in next 5 years? = Yes  
Or If no or not sure, do you plan to in next 5 years? = Maybe  
Or If no or not sure, do you plan to in next 5 years? = No  
Or Artificial intelligence (AI) is a set of technologies (including machine learning) that can go be... = I have read the above statement and agree to take the survey  
Or Artificial intelligence (AI) is a set of technologies (including machine learning) that can go be... = I do not agree to take the survey*

Q16 Please offer any **additional comments** (optional).

\_\_\_\_\_



Table S1. Survey Results

| Temporary ID | Have you in the past, or do you currently use, some form of AI in your water system's operations? | If no or not sure, do you plan to in next 5 years? | At what stage is your use of AI? - Selected Choice         | At what stage is your use of AI? - Other - Text                                                                                                                                                                                       | How long have you used AI in your water system? | What do you use AI for? Select all that apply. - Selected Choice | What do you use AI for? Select all that apply. - Other - Text | Please explain your response to the previous question.   | What area of the system do you use or plan to use it for? Select all that apply. - Selected Choice | What area of the system do you use or plan to use it for? Select all that apply. - Other - Text | Describe your motivations for using or planning to use AI. Select up to 3. - Selected Choice | Describe your motivations for using or planning to use AI. Select up to 3. - Other - Text                                                         | Please explain your response to the previous question.2                                                                                                                | Please select the benefits you have seen from using AI in your water system. Select up to 3. - Selected Choice | Please select the benefits you have seen from using AI in your water system. Select up to 3. - Other - Text | Please select the benefits you would like to see from using AI in your water system. Select up to 3. - Selected Choice | Please select the benefits you would like to see from using AI in your water system. Select up to 3. - Other - Text | Please explain why you picked your top 3 benefits.                                                                                                                                                                                                                                                                       | What are the barriers that you have seen or are preventing you from currently using AI in your system? Select up to 3. - Selected Choice                                                                                                                                             | What are the barriers that you have seen or are preventing you from currently using AI in your system? Select up to 3. - Other - Text                                                                                                   | Please explain why you picked your top 3 barriers.                                                                                                                                                                        | Please offer any additional comments (optional).                                                                                   |       |
|--------------|---------------------------------------------------------------------------------------------------|----------------------------------------------------|------------------------------------------------------------|---------------------------------------------------------------------------------------------------------------------------------------------------------------------------------------------------------------------------------------|-------------------------------------------------|------------------------------------------------------------------|---------------------------------------------------------------|----------------------------------------------------------|----------------------------------------------------------------------------------------------------|-------------------------------------------------------------------------------------------------|----------------------------------------------------------------------------------------------|---------------------------------------------------------------------------------------------------------------------------------------------------|------------------------------------------------------------------------------------------------------------------------------------------------------------------------|----------------------------------------------------------------------------------------------------------------|-------------------------------------------------------------------------------------------------------------|------------------------------------------------------------------------------------------------------------------------|---------------------------------------------------------------------------------------------------------------------|--------------------------------------------------------------------------------------------------------------------------------------------------------------------------------------------------------------------------------------------------------------------------------------------------------------------------|--------------------------------------------------------------------------------------------------------------------------------------------------------------------------------------------------------------------------------------------------------------------------------------|-----------------------------------------------------------------------------------------------------------------------------------------------------------------------------------------------------------------------------------------|---------------------------------------------------------------------------------------------------------------------------------------------------------------------------------------------------------------------------|------------------------------------------------------------------------------------------------------------------------------------|-------|
| 1            | Yes                                                                                               |                                                    | We have partially integrated AI models into our system.    |                                                                                                                                                                                                                                       | More than 5 years                               | Optimization                                                     |                                                               | used to pump water at optimal times for energy savings   | Distribution                                                                                       |                                                                                                 | improve water quality,improve hydraulics,save energy                                         |                                                                                                                                                   | With SCADA and AI we can optimize water movement within the District                                                                                                   | Automate complex system,save time/labor                                                                        |                                                                                                             |                                                                                                                        |                                                                                                                     | reduced the manual efforts and increased efficiency                                                                                                                                                                                                                                                                      | Other:                                                                                                                                                                                                                                                                               | Time                                                                                                                                                                                                                                    | takes time to pull the info together                                                                                                                                                                                      |                                                                                                                                    |       |
| 2            | Yes                                                                                               |                                                    | We have manually used AI models for analyses.              |                                                                                                                                                                                                                                       | 2-5 years                                       | Prediction                                                       |                                                               | predictive main breaks and sewer tv condition assessment | Distribution                                                                                       |                                                                                                 | Save money,save time/labor,enhance water conservation                                        |                                                                                                                                                   | determine which mains are likely to break most often and replace them. We are short on employees so may use AI to determine condition of pipe through sewer pipe video | Automate complex system,Integrate with other technologies,Enhance water conservation                           |                                                                                                             |                                                                                                                        |                                                                                                                     | using AI has helped us determine projects for water main replacement and also for determining who is watering more than they should.                                                                                                                                                                                     | Payback - Uncertainty about return on investment, or long payback time for investment in AI,Data Availability - Not having enough data to make AI meaningful, Scalability/Repeatability - Not being able to advance from one-time AI experiments to full-scale, ongoing integration. |                                                                                                                                                                                                                                         | We would like to use AI to determine lead service lines but we don't have enough information to make it worth it. We have used AI to do a onetime look at our water mains but it is expensive and hard to do consistently |                                                                                                                                    |       |
| 3            | Yes                                                                                               |                                                    | We have partially integrated AI models into our system.    |                                                                                                                                                                                                                                       | Less than 2 years                               | Optimization                                                     |                                                               | Pump sequencing energy analysis and recommendations      | Distribution                                                                                       |                                                                                                 | Save money,Automate complex system,save energy                                               |                                                                                                                                                   | Save money,Automate complex system,save energy                                                                                                                         | Save money,Automate complex system,save energy                                                                 |                                                                                                             |                                                                                                                        |                                                                                                                     | Our overall wire to water efficiency (incoming horsepower/water horsepower) is decreasing which helps manage increasing energy rates. Energy is one of our largest expenses                                                                                                                                              | Data Availability - Not having enough data to make AI meaningful,Data Quality - Not having access to the right kind of data to make AI meaningful.                                                                                                                                   |                                                                                                                                                                                                                                         | Accurate field data is important for energy recommendations. This requires the installation of accurate energy and volumetric meters. This is a large foundational task for a medium large agency                         |                                                                                                                                    |       |
| 4            | Yes                                                                                               |                                                    | We have manually used AI models for analyses.              | We used sensors for machine learning on pumps (vibration, temp, etc.) for predictive modeling of failure. This was in the late 1990s. It was over the operator's capabilities and was never fully utilized. It is not used currently. | More than 5 years                               | Prediction,Other:                                                | pump motor failure                                            | We no longer use it....                                  | Distribution,Other:                                                                                | lead service lines, possibly                                                                    | Improve water quality,improve public perception,Other:                                       | lead service line prediction                                                                                                                      | use onsite inspection to populate GIS; do cohort data analysis and other trending analyses to try and predict lead service lines without digging for verification      | Other:                                                                                                         | none...not currently used.                                                                                  |                                                                                                                        |                                                                                                                     |                                                                                                                                                                                                                                                                                                                          | N/A                                                                                                                                                                                                                                                                                  | Funding - Not having the money to commit to AI projects,Payback - Uncertainty about return on investment, or long payback time for investment in AI,Personel Skills - Not having staff or consultants who know how to use or manage AI. |                                                                                                                                                                                                                           | Self explanatory. Expensive to provide, staff not skilled to interpret or run analytics, and hence finding payback is not feasible | none. |
| 5            | Yes                                                                                               |                                                    | We have manually used AI models for analyses.              |                                                                                                                                                                                                                                       | Less than 2 years                               | Optimization                                                     |                                                               |                                                          | Distribution,Other:                                                                                | Sewage Collection System Condition Assessment                                                   | Save money,Automate complex system,save time/labor,improve public perception,Detect leaks    |                                                                                                                                                   | Save time/labor,Integrate with other technologies                                                                                                                      |                                                                                                                |                                                                                                             |                                                                                                                        |                                                                                                                     | Data Quality - Not having access to the right kind of data to make AI meaningful,Personel Skills - Not having staff or consultants who know how to use or manage AI,Scalability/Repeatability - Not being able to advance from one-time AI experiments to full-scale, ongoing integration,Prefer to use other technology |                                                                                                                                                                                                                                                                                      | Water and sewer operation personnel have a conservative mindset when adopting new technology they are not familiar with (esp. Water/WW treatment plant staff)                                                                           |                                                                                                                                                                                                                           |                                                                                                                                    |       |
| 6            | Yes                                                                                               |                                                    | We have experimented with predictions and training models. |                                                                                                                                                                                                                                       |                                                 |                                                                  | We use lake level prediction models for our reservoir         | Other:                                                   | reservoir                                                                                          | Enhance water conservation                                                                      |                                                                                              | If we need to enhance conservation measures because of lake level forecasting results, we can do so ahead of additional drops in reservoir levels |                                                                                                                                                                        | Improve water quality,Integrate with other technologies,Enhance water conservation                             |                                                                                                             |                                                                                                                        |                                                                                                                     | The provision of clean safe drinking water is our mission                                                                                                                                                                                                                                                                | Payback - Uncertainty about return on investment, or long payback time for investment in AI,Data Availability - Not having enough data to make AI meaningful, Scalability/Repeatability - Not being able to advance from one-time AI experiments to full-scale, ongoing integration. |                                                                                                                                                                                                                                         | Those are need to have things                                                                                                                                                                                             |                                                                                                                                    |       |

| Temporary ID | Have you in the past, or do you currently use, some form of AI in your water system's operations? | If no or not sure, do you plan to in next 5 years? | At what stage is your use of AI? - Selected Choice         | At what stage is your use of AI? - Other - Text | How long have you used AI in your water system? | What do you use AI for? Select all that apply. - Selected Choice | What do you use AI for? Select all that apply. - Other - Text                                        | Please explain your response to the previous question. | What area of the system do you use or plan to use it for? Select all that apply. - Selected Choice | What area of the system do you use or plan to use it for? Select all that apply. - Other - Text | Describe your motivations for using or planning to use AI. Select up to 3. - Selected Choice                                                                                                                         | Describe your motivations for using or planning to use AI. Select up to 3. - Other - Text                                                                        | Please explain your response to the previous question. 2                       | Please select the benefits you have seen from using AI in your water system. Select up to 3. - Selected Choice | Please select the benefits you have seen from using AI in your water system. Select up to 3. - Other - Text | Please select the benefits you would like to see from using AI in your water system. Select up to 3. - Selected Choice | Please select the benefits you would like to see from using AI in your water system. Select up to 3. - Other - Text | Please explain why you picked your top 3 benefits. | What are the barriers that you have seen or are preventing you from currently using AI in your system? Select up to 3. - Other - Text                                                                                                   | What are the barriers that you have seen or are preventing you from currently using AI in your system? Select up to 3. - Other - Text                                                                                                                                                         | Please explain why you picked your top 3 barriers. | Please offer any additional comments (optional). |                                                                                                                                         |
|--------------|---------------------------------------------------------------------------------------------------|----------------------------------------------------|------------------------------------------------------------|-------------------------------------------------|-------------------------------------------------|------------------------------------------------------------------|------------------------------------------------------------------------------------------------------|--------------------------------------------------------|----------------------------------------------------------------------------------------------------|-------------------------------------------------------------------------------------------------|----------------------------------------------------------------------------------------------------------------------------------------------------------------------------------------------------------------------|------------------------------------------------------------------------------------------------------------------------------------------------------------------|--------------------------------------------------------------------------------|----------------------------------------------------------------------------------------------------------------|-------------------------------------------------------------------------------------------------------------|------------------------------------------------------------------------------------------------------------------------|---------------------------------------------------------------------------------------------------------------------|----------------------------------------------------|-----------------------------------------------------------------------------------------------------------------------------------------------------------------------------------------------------------------------------------------|-----------------------------------------------------------------------------------------------------------------------------------------------------------------------------------------------------------------------------------------------------------------------------------------------|----------------------------------------------------|--------------------------------------------------|-----------------------------------------------------------------------------------------------------------------------------------------|
| 7            | Yes                                                                                               |                                                    | We have experimented with predictions and training models. |                                                 |                                                 |                                                                  |                                                                                                      |                                                        | Treatment                                                                                          |                                                                                                 | Improve water quality, Automate complex system, Detect leaks                                                                                                                                                         |                                                                                                                                                                  |                                                                                |                                                                                                                |                                                                                                             |                                                                                                                        |                                                                                                                     |                                                    | Funding - Not having the money to commit to AI projects, Payback - Uncertainty about return on investment, or long payback time for investment in AI, Data Quality - Not having access to the right kind of data to make AI meaningful. |                                                                                                                                                                                                                                                                                               |                                                    |                                                  |                                                                                                                                         |
| 8            | Yes                                                                                               |                                                    | We have partially integrated AI models into our system.    |                                                 | 2-5 years                                       | Optimization                                                     |                                                                                                      |                                                        | Treatment                                                                                          |                                                                                                 | Improve water quality, Save money                                                                                                                                                                                    |                                                                                                                                                                  |                                                                                | Improve water quality, Save money                                                                              |                                                                                                             |                                                                                                                        |                                                                                                                     |                                                    |                                                                                                                                                                                                                                         |                                                                                                                                                                                                                                                                                               |                                                    |                                                  |                                                                                                                                         |
| 9            | Yes                                                                                               |                                                    | We have experimented with predictions and training models. |                                                 | Less than 2 years                               | Prediction                                                       | If this then what?                                                                                   |                                                        | Treatment, Distribution                                                                            |                                                                                                 | Integrate with other technologies, Other                                                                                                                                                                             | We are a data driven organization. We go where the data and trends lead us. We always try to predict the outcome and judge and record our successes and failures |                                                                                | Integrate with other technologies                                                                              |                                                                                                             |                                                                                                                        |                                                                                                                     |                                                    | We just never know exactly what the outcome may be. We're as wrong as we are correct                                                                                                                                                    | Personnel Skills - Not having staff or consultants who know how to use or manage AI, Scalability/Repeatability - Not being able to advance from one-time AI experiments to full-scale, ongoing integration, Other:                                                                            | Hard to find qualified staff                       |                                                  | I really think 60% of the future and we actually use AI in it most basic, crocker farm, plenty rain, ph goes up harder to coagulate etc |
| 10           | Yes                                                                                               |                                                    | We have manually used AI models for analyses.              |                                                 | More than 5 years                               | Prediction, Optimization                                         |                                                                                                      |                                                        | Treatment, Distribution                                                                            |                                                                                                 | Improve water quality, Improve hydraulics, Automate complex system                                                                                                                                                   |                                                                                                                                                                  |                                                                                | Improve water quality, Improve hydraulics, Automate complex system                                             |                                                                                                             |                                                                                                                        |                                                                                                                     |                                                    | Funding - Not having the money to commit to AI projects, Personnel Skills - Not having staff or consultants who know how to use or manage AI                                                                                            |                                                                                                                                                                                                                                                                                               |                                                    |                                                  |                                                                                                                                         |
| 11           | Yes                                                                                               |                                                    |                                                            |                                                 |                                                 |                                                                  |                                                                                                      |                                                        |                                                                                                    |                                                                                                 |                                                                                                                                                                                                                      |                                                                                                                                                                  |                                                                                |                                                                                                                |                                                                                                             |                                                                                                                        |                                                                                                                     |                                                    |                                                                                                                                                                                                                                         |                                                                                                                                                                                                                                                                                               |                                                    |                                                  |                                                                                                                                         |
| 12           | Not sure                                                                                          | No                                                 |                                                            |                                                 |                                                 |                                                                  |                                                                                                      |                                                        |                                                                                                    |                                                                                                 |                                                                                                                                                                                                                      |                                                                                                                                                                  |                                                                                |                                                                                                                |                                                                                                             |                                                                                                                        |                                                                                                                     | Realistic Expectations                             | Other:                                                                                                                                                                                                                                  | AI is not reliable at this time. Uses are still limited to leak detection and alarms.                                                                                                                                                                                                         | most benefit                                       |                                                  |                                                                                                                                         |
| 13           | Not sure                                                                                          |                                                    |                                                            |                                                 |                                                 |                                                                  |                                                                                                      |                                                        |                                                                                                    |                                                                                                 |                                                                                                                                                                                                                      |                                                                                                                                                                  |                                                                                |                                                                                                                |                                                                                                             |                                                                                                                        |                                                                                                                     |                                                    |                                                                                                                                                                                                                                         |                                                                                                                                                                                                                                                                                               |                                                    |                                                  |                                                                                                                                         |
| 14           | No                                                                                                | Yes                                                |                                                            |                                                 |                                                 |                                                                  | We anticipate using machine learning in the future to predict normal usage patterns                  |                                                        | Distribution                                                                                       |                                                                                                 | Improve hydraulics, Save money, Automate complex system, Save energy, Save time/labor, Integrate with other technologies, Enhance water conservation, Detect leaks                                                   |                                                                                                                                                                  |                                                                                |                                                                                                                |                                                                                                             |                                                                                                                        |                                                                                                                     |                                                    | Water conservation is our top priority                                                                                                                                                                                                  | Personnel Skills - Not having staff or consultants who know how to use or manage AI                                                                                                                                                                                                           |                                                    |                                                  |                                                                                                                                         |
| 15           | No                                                                                                | Yes                                                |                                                            |                                                 |                                                 |                                                                  | Having discussions about using AI to predict main breaks so water mains can be replaced proactively. |                                                        | Distribution                                                                                       |                                                                                                 | Save money, Improve public perception, Detect leaks                                                                                                                                                                  |                                                                                                                                                                  | Leaks will become breaks which are costly to repair and harm our public image. |                                                                                                                |                                                                                                             |                                                                                                                        |                                                                                                                     |                                                    | Leaks will become breaks which are costly to repair and harm our public image.                                                                                                                                                          | Data Availability - Not having enough data to make AI meaningful, Personnel Skills - Not having staff or consultants who know how to use or manage AI                                                                                                                                         |                                                    |                                                  | Data in GIS is still being refined and staff are too busy fighting other fires.                                                         |
| 16           | No                                                                                                | Yes                                                |                                                            |                                                 |                                                 |                                                                  | We are piloting pipe failure prediction in our distribution system                                   |                                                        | Treatment, Distribution                                                                            |                                                                                                 | Improve water quality, Improve hydraulics, Save money, Automate complex system, Save energy, Save time/labor, Integrate with other technologies, Improve public perception, Enhance water conservation, Detect leaks |                                                                                                                                                                  |                                                                                |                                                                                                                |                                                                                                             |                                                                                                                        |                                                                                                                     |                                                    | These are key focus of our utility.                                                                                                                                                                                                     | Data Quality - Not having access to the right kind of data to make AI meaningful, Personnel Skills - Not having staff or consultants who know how to use or manage AI, Scalability/Repeatability - Not being able to advance from one-time AI experiments to full-scale, ongoing integration. |                                                    |                                                  |                                                                                                                                         |

| Temporary ID | Have you in the past or do you currently use, some form of AI in your water system's operations? | If no or not sure, do you plan to in next 5 years? | At what stage is your use of AI? - Selected Choice | At what stage is your use of AI? - Other - Text | How long have you used AI in your water system? | What do you use AI for? Select all that apply - Selected Choice | What do you use AI for? Select all that apply - Other - Text | Please explain your response to the previous question.                                                                           | What area of the system do you use or plan to use it for? Select all that apply - Selected Choice | What area of the system do you use or plan to use it for? Select all that apply - Other - Text | Describe your motivations for using or planning to use AI. Select up to 3 - Selected Choice | Describe your motivations for using or planning to use AI. Select up to 3 - Other - Text | Please explain your response to the previous question.2 | Please select the benefits you have seen from using AI in your water system. Select up to 3 - Selected Choice | Please select the benefits you have seen from using AI in your water system. Select up to 3 - Other - Text | Please select the benefits you would like to see from using AI in your water system. Select up to 3 - Selected Choice | Please select the benefits you would like to see from using AI in your water system. Select up to 3 - Other - Text | Please explain why you picked your top 3 benefits.                                                                                                           | What are the barriers that you have seen or are preventing you from currently using AI in your system? Select up to 3 - Selected Choice                                                                                                            | What are the barriers that you have seen or are preventing you from currently using AI in your system? Select up to 3 - Other - Text | Please explain why you picked your top 3 barriers.                                                                                                                                | Please offer any additional comments (optional).                                                                    |
|--------------|--------------------------------------------------------------------------------------------------|----------------------------------------------------|----------------------------------------------------|-------------------------------------------------|-------------------------------------------------|-----------------------------------------------------------------|--------------------------------------------------------------|----------------------------------------------------------------------------------------------------------------------------------|---------------------------------------------------------------------------------------------------|------------------------------------------------------------------------------------------------|---------------------------------------------------------------------------------------------|------------------------------------------------------------------------------------------|---------------------------------------------------------|---------------------------------------------------------------------------------------------------------------|------------------------------------------------------------------------------------------------------------|-----------------------------------------------------------------------------------------------------------------------|--------------------------------------------------------------------------------------------------------------------|--------------------------------------------------------------------------------------------------------------------------------------------------------------|----------------------------------------------------------------------------------------------------------------------------------------------------------------------------------------------------------------------------------------------------|--------------------------------------------------------------------------------------------------------------------------------------|-----------------------------------------------------------------------------------------------------------------------------------------------------------------------------------|---------------------------------------------------------------------------------------------------------------------|
| 17           | No                                                                                               | No                                                 |                                                    |                                                 |                                                 |                                                                 |                                                              |                                                                                                                                  |                                                                                                   |                                                                                                |                                                                                             |                                                                                          |                                                         |                                                                                                               |                                                                                                            |                                                                                                                       | Save money, Automate complex system, Detect leaks                                                                  | efficiency                                                                                                                                                   | Payback - Uncertainty about return on investment, or long payback time for investment in AI. Data Availability - Not having enough data to make AI meaningful. Other:                                                                              | no knowledge of possibilities                                                                                                        | not much known                                                                                                                                                                    |                                                                                                                     |
| 18           | No                                                                                               | No                                                 |                                                    |                                                 |                                                 |                                                                 |                                                              |                                                                                                                                  |                                                                                                   |                                                                                                |                                                                                             |                                                                                          |                                                         |                                                                                                               |                                                                                                            |                                                                                                                       | Other:                                                                                                             | It is important to have trained staff that understand the operation of the water system and not rely on AI to perform these functions.                       | As noted, moving away from trained staff to perform the operation of the water system will endanger safety.                                                                                                                                        | Prefer to use other technology                                                                                                       | In addition to making the system less safe, the use of AI will cost more because the expense of software and programmers is more than the expense of trained water professionals. | A water system should never be "set on automatic" and should always be monitored and operated by experienced staff. |
| 19           | No                                                                                               | No                                                 |                                                    |                                                 |                                                 |                                                                 |                                                              |                                                                                                                                  |                                                                                                   |                                                                                                |                                                                                             |                                                                                          |                                                         |                                                                                                               |                                                                                                            |                                                                                                                       | Integrate with other technologies                                                                                  | I picked only one because I do not believe it can be used stand alone                                                                                        | Personnel Skills - Not having staff or consultants who know how to use or manage AI.                                                                                                                                                               |                                                                                                                                      | Not convinced it can be reliable for making critical decisions                                                                                                                    |                                                                                                                     |
| 20           | No                                                                                               | No                                                 |                                                    |                                                 |                                                 |                                                                 |                                                              |                                                                                                                                  |                                                                                                   |                                                                                                |                                                                                             |                                                                                          |                                                         |                                                                                                               |                                                                                                            |                                                                                                                       | Improve water quality, Save money, Automate complex system, Save energy, Save time, labor, Detect leaks            | Running a large water plant can be difficult during peak water quality events. AI could potentially help with making decisions based on previous experience. | Payback - Uncertainty about return on investment, or long payback time for investment in AI. Scalability/Repeatability - Not being able to advance from one-time AI experiments to full-scale, ongoing integration. Prefer to use other technology | I don't know enough about how it can interface with our systems to be beneficial or not.                                             |                                                                                                                                                                                   |                                                                                                                     |
| 21           | No                                                                                               | No                                                 |                                                    |                                                 |                                                 |                                                                 |                                                              |                                                                                                                                  |                                                                                                   |                                                                                                |                                                                                             |                                                                                          |                                                         |                                                                                                               |                                                                                                            |                                                                                                                       | Save money, Save energy, Save time, labor                                                                          | Saving time, money and energy are basic goals that would be applicable to any project.                                                                       | Payback - Uncertainty about return on investment, or long payback time for investment in AI. Personnel Skills - Not having staff or consultants who know how to use or manage AI.                                                                  |                                                                                                                                      | Return on investment is a basic criteria to work towards buy-in from our organization.                                                                                            |                                                                                                                     |
| 22           | No                                                                                               | No                                                 |                                                    |                                                 |                                                 |                                                                 |                                                              |                                                                                                                                  |                                                                                                   |                                                                                                |                                                                                             |                                                                                          |                                                         |                                                                                                               |                                                                                                            |                                                                                                                       | Automate complex system, Integrate with other technologies, Detect leaks                                           |                                                                                                                                                              | Funding - Not having the money to commit to AI projects. Payback - Uncertainty about return on investment, or long payback time for investment in AI. Data Availability - Not having enough data to make AI meaningful.                            |                                                                                                                                      |                                                                                                                                                                                   |                                                                                                                     |
| 23           | No                                                                                               | No                                                 |                                                    |                                                 |                                                 |                                                                 |                                                              |                                                                                                                                  |                                                                                                   |                                                                                                |                                                                                             |                                                                                          |                                                         |                                                                                                               |                                                                                                            |                                                                                                                       | Other:                                                                                                             | N/A                                                                                                                                                          | We don't plan on using AI                                                                                                                                                                                                                          | Funding - Not having the money to commit to AI projects                                                                              | Other                                                                                                                                                                             |                                                                                                                     |
| 24           | No                                                                                               | Maybe                                              |                                                    |                                                 |                                                 |                                                                 |                                                              | It depends on what and how it is used. Currently, all programs needed human interface to set it up. That is very time consuming. | Distribution                                                                                      |                                                                                                | Save time, labor, Enhance water conservation                                                |                                                                                          |                                                         |                                                                                                               |                                                                                                            |                                                                                                                       | Save money                                                                                                         | Saving is the bottom line. Otherwise, why do it.                                                                                                             | Data Availability - Not having enough data to make AI meaningful. Data Quality - Not having access to the right kind of data to make AI meaningful. Other:                                                                                         | So far, all the AI claimed is questionable for the water industry.                                                                   |                                                                                                                                                                                   |                                                                                                                     |

| Temporary ID | Have you in the past, or do you currently use, some form of AI in your water system's operations? | If no or not sure, do you plan to in next 5 years? | At what stage is your use of AI? - Selected Choice | At what stage is your use of AI? - Other: - Text | How long have you used AI in your water system? | What do you use AI for? Select all that apply. - Selected Choice | What do you use AI for? Select all that apply. - Other: - Text | Please explain your response to the previous question.                           | What area of the system do you use or plan to use it for? Select all that apply. - Selected Choice | What area of the system do you use or plan to use it for? Select all that apply. - Other: - Text | Describe your motivations for using or planning to use AI. Select up to 3. - Selected Choice | Describe your motivations for using or planning to use AI. Select up to 3. - Other: - Text | Please explain your response to the previous question.2 | Please select the benefits you have seen from using AI in your water system. Select up to 4. - Selected Choice | Please select the benefits you have seen from using AI in your water system. Select up to 3. - Other: - Text | Please select the benefits you would like to see from using AI in your water system. Select up to 3. - Selected Choice | Please select the benefits you would like to see from using AI in your water system. Select up to 3. - Other: - Text | Please explain why you picked your top 3 benefits.                        | What are the barriers that you have seen or are preventing you from currently using AI in your system? Select up to 3. - Selected Choice | What are the barriers that you have seen or are preventing you from currently using AI in your system? Select up to 3. - Other: - Text                                                                                                   | Please explain why you picked your top 3 barriers.                                                                                                                                                                                       | Please offer any additional comments (optional). |                                                                                                                                                                                |  |
|--------------|---------------------------------------------------------------------------------------------------|----------------------------------------------------|----------------------------------------------------|--------------------------------------------------|-------------------------------------------------|------------------------------------------------------------------|----------------------------------------------------------------|----------------------------------------------------------------------------------|----------------------------------------------------------------------------------------------------|--------------------------------------------------------------------------------------------------|----------------------------------------------------------------------------------------------|--------------------------------------------------------------------------------------------|---------------------------------------------------------|----------------------------------------------------------------------------------------------------------------|--------------------------------------------------------------------------------------------------------------|------------------------------------------------------------------------------------------------------------------------|----------------------------------------------------------------------------------------------------------------------|---------------------------------------------------------------------------|------------------------------------------------------------------------------------------------------------------------------------------|------------------------------------------------------------------------------------------------------------------------------------------------------------------------------------------------------------------------------------------|------------------------------------------------------------------------------------------------------------------------------------------------------------------------------------------------------------------------------------------|--------------------------------------------------|--------------------------------------------------------------------------------------------------------------------------------------------------------------------------------|--|
| 25           | No                                                                                                | Maybe                                              |                                                    |                                                  |                                                 |                                                                  |                                                                |                                                                                  | Distribution                                                                                       |                                                                                                  | Detect leaks,Other:                                                                          | Main break predictions                                                                     |                                                         |                                                                                                                |                                                                                                              |                                                                                                                        |                                                                                                                      | Detect leaks,Other:                                                       | Main break predictions                                                                                                                   | Seen industry success with AI in these areas.                                                                                                                                                                                            | Funding - Not having the money to commit to AI projects,Payback - Uncertainty about return on investment, or long payback time for investment in AI,Personnel Skills - Not having staff or consultants who know how to use or manage AI. |                                                  | Funding always an issue. Currently do not have staff that have experience with AI.                                                                                             |  |
| 26           | No                                                                                                | Maybe                                              |                                                    |                                                  |                                                 |                                                                  |                                                                | I am considering AI solutions that will help prioritize water main replacements. | Distribution                                                                                       |                                                                                                  | Improve hydraulics,Save money                                                                |                                                                                            |                                                         |                                                                                                                |                                                                                                              |                                                                                                                        |                                                                                                                      | Automate complex system,Save time,labor,Integrate with other technologies |                                                                                                                                          | My interest in AI is that it could help us recognize relationships between different departments, organize the data we collect and provide actionable results.                                                                           | Funding - Not having the money to commit to AI projects,Payback - Uncertainty about return on investment, or long payback time for investment in AI,Personnel Skills - Not having staff or consultants who know how to use or manage AI. |                                                  | AI is a popular topic, but I haven't seen many practical benefits compared to our current methods.                                                                             |  |
| 27           | No                                                                                                | Maybe                                              |                                                    |                                                  |                                                 |                                                                  |                                                                |                                                                                  | Distribution                                                                                       |                                                                                                  | Improve water quality,Save money,Detect leaks                                                |                                                                                            |                                                         |                                                                                                                |                                                                                                              |                                                                                                                        |                                                                                                                      | Improve water quality,Save time,labor                                     |                                                                                                                                          | Funding - Not having the money to commit to AI projects,Payback - Uncertainty about return on investment, or long payback time for investment in AI,Personnel Skills - Not having staff or consultants who know how to use or manage AI. |                                                                                                                                                                                                                                          |                                                  |                                                                                                                                                                                |  |
| 28           | No                                                                                                | Maybe                                              |                                                    |                                                  |                                                 |                                                                  |                                                                |                                                                                  | Distribution                                                                                       |                                                                                                  | Save money,Enhance water conservation,Detect leaks                                           |                                                                                            |                                                         |                                                                                                                |                                                                                                              |                                                                                                                        |                                                                                                                      | Save money,Enhance water conservation,Detect leaks                        |                                                                                                                                          | Funding - Not having the money to commit to AI projects,Payback - Uncertainty about return on investment, or long payback time for investment in AI                                                                                      |                                                                                                                                                                                                                                          |                                                  |                                                                                                                                                                                |  |
| 29           | No                                                                                                | Maybe                                              |                                                    |                                                  |                                                 |                                                                  |                                                                | AI could be implemented in the future to improve efficiency.                     | Distribution                                                                                       |                                                                                                  | Improve water quality,Save money,Save energy                                                 |                                                                                            |                                                         |                                                                                                                |                                                                                                              |                                                                                                                        |                                                                                                                      | Improve water quality,Save money,Save energy                              |                                                                                                                                          | Data Availability - Not having enough data to make AI meaningful,Data Quality - Not having access to the right kind of data to make AI meaningful,Personnel Skills - Not having staff or consultants who know how to use or manage AI.   |                                                                                                                                                                                                                                          |                                                  |                                                                                                                                                                                |  |
| 30           | No                                                                                                | Maybe                                              |                                                    |                                                  |                                                 |                                                                  |                                                                |                                                                                  | Other:                                                                                             | Not sure what type of technology we will employ in 5 years                                       | Improve water quality,Save money,Automate complex system,Save time,labor                     |                                                                                            | This is always what we strive to do                     |                                                                                                                |                                                                                                              |                                                                                                                        |                                                                                                                      | Improve water quality,Save money,Automate complex system                  |                                                                                                                                          | We are always looking for opportunities to improve water quality and our efficiency                                                                                                                                                      | Funding - Not having the money to commit to AI projects,Personnel Skills - Not having staff or consultants who know how to use or manage AI,Other:                                                                                       |                                                  | Funding is always our biggest issue. After that is the labor is our biggest problem. Hiring qualified personnel has historically been difficult but is currently even more so. |  |

| Temporary ID | Have you in the past, or do you currently use, some form of AI in your water system's operations? | If no or not sure, do you plan to in next 5 years? | At what stage is your use of AI? - Selected Choice | At what stage is your use of AI? - Other - Text | How long have you used AI in your water system? | What do you use AI for? Select all that apply. - Selected Choice | What do you use AI for? Select all that apply. - Other - Text | Please explain your response to the previous question.                                                                                                                                                                                             | What area of the system do you use or plan to use it for? - Selected Choice | What area of the system do you use or plan to use it for? - Other - Text | Describe your motivations for using or planning to use AI. Select up to 3. - Selected Choice | Describe your motivations for using or planning to use AI. Select up to 3. - Other - Text | Please explain your response to the previous question.2                                                                                                                                                                                                                                                                              | Please select the benefits you have seen from using AI in your water system. Select up to 3. - Selected Choice | Please select the benefits you have seen from using AI in your water system. Select up to 3. - Other - Text | Please select the benefits you would like to see from using AI in your water system. Select up to 3. - Selected Choice | Please select the benefits you would like to see from using AI in your water system. Select up to 3. - Other - Text | Please explain why you picked your top 3 benefits.                                                                                                                                                                                                                                                                                                                                                                                                       | What are the barriers that you have seen or are preventing you from currently using AI in your system? Select up to 3. - Selected Choice                                                                                                           | What are the barriers that you have seen or are preventing you from currently using AI in your system? Select up to 3. - Other - Text                                                                                                                                                                                                                                                                                                                                                                                                                                                                                                                          | Please explain why you picked your top 3 barriers.                                                                                                         | Please offer any additional comments (optional). |
|--------------|---------------------------------------------------------------------------------------------------|----------------------------------------------------|----------------------------------------------------|-------------------------------------------------|-------------------------------------------------|------------------------------------------------------------------|---------------------------------------------------------------|----------------------------------------------------------------------------------------------------------------------------------------------------------------------------------------------------------------------------------------------------|-----------------------------------------------------------------------------|--------------------------------------------------------------------------|----------------------------------------------------------------------------------------------|-------------------------------------------------------------------------------------------|--------------------------------------------------------------------------------------------------------------------------------------------------------------------------------------------------------------------------------------------------------------------------------------------------------------------------------------|----------------------------------------------------------------------------------------------------------------|-------------------------------------------------------------------------------------------------------------|------------------------------------------------------------------------------------------------------------------------|---------------------------------------------------------------------------------------------------------------------|----------------------------------------------------------------------------------------------------------------------------------------------------------------------------------------------------------------------------------------------------------------------------------------------------------------------------------------------------------------------------------------------------------------------------------------------------------|----------------------------------------------------------------------------------------------------------------------------------------------------------------------------------------------------------------------------------------------------|----------------------------------------------------------------------------------------------------------------------------------------------------------------------------------------------------------------------------------------------------------------------------------------------------------------------------------------------------------------------------------------------------------------------------------------------------------------------------------------------------------------------------------------------------------------------------------------------------------------------------------------------------------------|------------------------------------------------------------------------------------------------------------------------------------------------------------|--------------------------------------------------|
| 31           | No                                                                                                | Maybe                                              |                                                    |                                                 |                                                 |                                                                  |                                                               | We are trying to gather more information about how the Commission's sewer and storm drainage system responds to storm events and how different storm events impact the systems. As more information is gathered it may influence future decisions. | Other:                                                                      | Sewer and Storm Drainage Collection                                      | Integrate with other technologies.Improve public perception.Other:                           | Increase staff understanding of how systems respond.                                      | By having a more complete understanding of how the system responds storm storm events, it may change the way we maintain the systems and it may help us decide on modifications that may be needed.                                                                                                                                  |                                                                                                                |                                                                                                             | Improve water quality.Improve public perception.Other:                                                                 | Increase security of the systems.                                                                                   | It would be interesting to see if AI could detect anomalies.                                                                                                                                                                                                                                                                                                                                                                                             | Payback - Uncertainty about return on investment, or long payback time for investment in AI.Data Availability - Not having enough data to make AI meaningful. Person el:Skills - Not having staff or consultants who know how to use or manage AI. |                                                                                                                                                                                                                                                                                                                                                                                                                                                                                                                                                                                                                                                                | The Commission uses rate payer money to fund projects. We would need to make a case of why this money would need to be spent.                              |                                                  |
| 32           | No                                                                                                | Maybe                                              |                                                    |                                                 |                                                 |                                                                  |                                                               | life™in not aware of what AI opportunities are available                                                                                                                                                                                           | Treatment                                                                   |                                                                          | Save energy.Enhance water conservation.Detect leaks                                          |                                                                                           |                                                                                                                                                                                                                                                                                                                                      |                                                                                                                | Save energy.Enhance water conservation.Detect leaks                                                         |                                                                                                                        |                                                                                                                     | Personnel:Skills - Not having staff or consultants who know how to use or manage AI.Other:                                                                                                                                                                                                                                                                                                                                                               | We are not aware of any process that isn't™ already automated in our SCADA System that could help us.                                                                                                                                              |                                                                                                                                                                                                                                                                                                                                                                                                                                                                                                                                                                                                                                                                |                                                                                                                                                            |                                                  |
| 33           | No                                                                                                | Maybe                                              |                                                    |                                                 |                                                 |                                                                  |                                                               | We have no immediate plans to use AI.                                                                                                                                                                                                              | Treatment                                                                   |                                                                          | Save money.Automate complex system.Save time:labor                                           |                                                                                           | I think there are opportunities to use more AI on the treatment side.                                                                                                                                                                                                                                                                |                                                                                                                | Improve water quality.Automate complex system.Save time:labor                                               |                                                                                                                        |                                                                                                                     | Motivations and benefits are similar.                                                                                                                                                                                                                                                                                                                                                                                                                    | Funding - Not having the money to commit to AI projects.Payback - Uncertainty about return on investment, or long payback time for investment in AI.Data Availability - Not having enough data to make AI meaningful.                              |                                                                                                                                                                                                                                                                                                                                                                                                                                                                                                                                                                                                                                                                |                                                                                                                                                            |                                                  |
| 34           | No                                                                                                | Maybe                                              |                                                    |                                                 |                                                 |                                                                  |                                                               |                                                                                                                                                                                                                                                    | Treatment                                                                   |                                                                          | Improve water quality.Save money.Automate complex system                                     |                                                                                           |                                                                                                                                                                                                                                                                                                                                      |                                                                                                                | Improve water quality.Save money.Automate complex system                                                    |                                                                                                                        |                                                                                                                     | Data Availability - Not having enough data to make AI meaningful. Person el:Skills - Not having staff or consultants who know how to use or manage AI.                                                                                                                                                                                                                                                                                                   |                                                                                                                                                                                                                                                    |                                                                                                                                                                                                                                                                                                                                                                                                                                                                                                                                                                                                                                                                |                                                                                                                                                            |                                                  |
| 35           | No                                                                                                | Maybe                                              |                                                    |                                                 |                                                 |                                                                  |                                                               | have not tried                                                                                                                                                                                                                                     | Treatment,Distribution                                                      |                                                                          | Improve water quality.Improve hydraulics.Save energy.Detect leaks                            |                                                                                           |                                                                                                                                                                                                                                                                                                                                      |                                                                                                                | Improve water quality.Improve hydraulics.Save energy                                                        |                                                                                                                        |                                                                                                                     | become more efficient for our customers                                                                                                                                                                                                                                                                                                                                                                                                                  | Funding - Not having the money to commit to AI projects.Payback - Uncertainty about return on investment, or long payback time for investment in AI.Other:                                                                                         | postponed due to pandemic                                                                                                                                                                                                                                                                                                                                                                                                                                                                                                                                                                                                                                      |                                                                                                                                                            |                                                  |
| 36           | No                                                                                                | Maybe                                              |                                                    |                                                 |                                                 |                                                                  |                                                               | Technology is always advancing, we may look into AI in the future                                                                                                                                                                                  | Treatment,Distribution                                                      |                                                                          | Improve water quality.Automate complex system.Integrate with other technologies              |                                                                                           | SCADA saves time and is a big help with automation, but AI may be a greater value in the future as systems become more complex and to ensure a safe water supply. Technology is always changing. AI systems may help keep up with advancements. A true AI system would have to prove it is safe and reliable before we would use it. |                                                                                                                | Improve water quality.Automate complex system.Save time:labor                                               |                                                                                                                        |                                                                                                                     | Water Quality regulations are becoming more stringent and will continue to do so as populations grow. Finding the right trained staff and keeping them is becoming more difficult in this industry. Processes are becoming more complicated and require a higher level of staff and attention. In the future an AI system may be able to help in all three areas which in turn keeps us able to continue to supply high quality and safe drinking water. | Funding - Not having the money to commit to AI projects.Payback - Uncertainty about return on investment, or long payback time for investment in AI.Prefer to use other technology                                                                 | Just more recently hearing more about AI. There is concern, unfamiliarity and discomfortableness with AI, possibly due to stereotyping due to movies, movies extra. Once AI has proven itself more in a wider range of industries and can prove to be safe, people will become more comfortable with the thought of it helping in a drinking water field. Drinking Water is critical and we don't want to take chances. Even with a simple SCADA system staff can become complacent and not as well trained as their predecessors were. True AI may keep people from learning and being able to perform their jobs in an emergency if the AI system went down. | A true AI system may be beneficial, but concerns exist over whether people will continue to learn in the water field if an AI system does it all for them. |                                                  |

| Temporary ID | Have you in the past, or do you currently use, some form of AI in your water system's operations? | If no or not sure, do you plan to in next 5 years? | AI what stage is your use of AI? - Selected Choice | AI what stage is your use of AI? - Other - Text | How long have you used AI in your water system? | What do you use AI for? Select all that apply. - Selected Choice | What do you use AI for? Select all that apply. - Other - Text | Please explain your response to the previous question.                                                                                                            | What area of the system do you use or plan to use it for? Select all that apply. - Selected Choice | What area of the system do you use or plan to use it for? Select all that apply. - Other - Text | Describe your motivations for using or planning to use AI. Select up to 3. - Selected Choice | Describe your motivations for using or planning to use AI. Select up to 3. - Other - Text | Please explain your response to the previous question.2                          | Please select the benefits you have seen from using AI in your water system. Select up to 3. - Selected Choice | Please select the benefits you have seen from using AI in your water system. Select up to 3. - Other - Text | Please select the benefits you would like to see from using AI in your water system. Select up to 3. - Selected Choice | Please select the benefits you would like to see from using AI in your water system. Select up to 3. - Other - Text | Please explain why you picked your top 3 benefits.                               | What are the barriers that you have seen or are preventing you from currently using AI in your system? Select up to 3. - Selected Choice                                                                                                                             | What are the barriers that you have seen or are preventing you from currently using AI in your system? Select up to 3. - Other - Text | Please explain why you picked your top 3 barriers. | Please offer any additional comments (optional). |
|--------------|---------------------------------------------------------------------------------------------------|----------------------------------------------------|----------------------------------------------------|-------------------------------------------------|-------------------------------------------------|------------------------------------------------------------------|---------------------------------------------------------------|-------------------------------------------------------------------------------------------------------------------------------------------------------------------|----------------------------------------------------------------------------------------------------|-------------------------------------------------------------------------------------------------|----------------------------------------------------------------------------------------------|-------------------------------------------------------------------------------------------|----------------------------------------------------------------------------------|----------------------------------------------------------------------------------------------------------------|-------------------------------------------------------------------------------------------------------------|------------------------------------------------------------------------------------------------------------------------|---------------------------------------------------------------------------------------------------------------------|----------------------------------------------------------------------------------|----------------------------------------------------------------------------------------------------------------------------------------------------------------------------------------------------------------------------------------------------------------------|---------------------------------------------------------------------------------------------------------------------------------------|----------------------------------------------------|--------------------------------------------------|
| 37           | No                                                                                                | Maybe                                              |                                                    |                                                 |                                                 |                                                                  |                                                               | I don't know if we plan to use AI                                                                                                                                 | Treatment, Distribution                                                                            |                                                                                                 | Automate complex system, Save energy, Detect leaks                                           |                                                                                           |                                                                                  |                                                                                                                |                                                                                                             |                                                                                                                        |                                                                                                                     |                                                                                  | Data Quality - Not having access to the right kind of data to make AI meaningful. Personnel Skills - Not having staff or consultants who know how to use or manage AI.                                                                                               |                                                                                                                                       |                                                    |                                                  |
| 38           | No                                                                                                | Maybe                                              |                                                    |                                                 |                                                 |                                                                  |                                                               | We are undergoing a SCADA master plan transitioning to new hardware/software. we need to get the new system up and operational then we may review options for AI. | Treatment, Distribution                                                                            |                                                                                                 | Improve water quality, Improve hydraulics, Save money, Integrate with other technologies     |                                                                                           | n/a                                                                              |                                                                                                                |                                                                                                             |                                                                                                                        |                                                                                                                     |                                                                                  | Data Availability - Not having enough data to make AI meaningful. Data Quality - Not having access to the right kind of data to make AI meaningful. Personnel Skills - Not having staff or consultants who know how to use or manage AI.                             |                                                                                                                                       |                                                    |                                                  |
| 39           | No                                                                                                | Maybe                                              |                                                    |                                                 |                                                 |                                                                  |                                                               | not sure how the AI will enhance our system, Cyber Security concerns                                                                                              | Treatment, Distribution, Other                                                                     | Water Reclamation                                                                               | Improve water quality, Automate complex system, Detect leaks                                 |                                                                                           | Enhance the operation of the system and/or make better operational decisions     |                                                                                                                |                                                                                                             |                                                                                                                        |                                                                                                                     | Enhance the operation of the system and/or make better operational decisions     | Funding - Not having the money to commit to AI projects, Personnel Skills - Not having staff or consultants who know how to use or manage AI, Scalability/Repeatability - Not being able to advance from one-time AI experiments to full-scale, ongoing integration. |                                                                                                                                       | Budget, staff availability                         |                                                  |
| 40           | No                                                                                                | Maybe                                              |                                                    |                                                 |                                                 |                                                                  |                                                               | There is growing interest in adding AI for chemical cost savings, but nothing firmly planned                                                                      |                                                                                                    |                                                                                                 | Improve water quality, Save money, Save energy                                               |                                                                                           |                                                                                  |                                                                                                                |                                                                                                             |                                                                                                                        |                                                                                                                     |                                                                                  | Data Quality - Not having access to the right kind of data to make AI meaningful. Other:                                                                                                                                                                             | Buy in from key stakeholders                                                                                                          |                                                    |                                                  |
| 41           | No                                                                                                | Maybe                                              |                                                    |                                                 |                                                 |                                                                  |                                                               |                                                                                                                                                                   |                                                                                                    |                                                                                                 | Save energy, Detect leaks                                                                    |                                                                                           |                                                                                  |                                                                                                                |                                                                                                             |                                                                                                                        |                                                                                                                     |                                                                                  | Personnel Skills - Not having staff or consultants who know how to use or manage AI.                                                                                                                                                                                 |                                                                                                                                       |                                                    |                                                  |
| 42           | No                                                                                                | Maybe                                              |                                                    |                                                 |                                                 |                                                                  |                                                               | Not sure AI is useful or tells me something I don't already know                                                                                                  |                                                                                                    |                                                                                                 | Save money, Save energy, Detect leaks                                                        |                                                                                           |                                                                                  |                                                                                                                |                                                                                                             |                                                                                                                        |                                                                                                                     |                                                                                  | Payback - Uncertainty about return on investment, or long payback time for investment in AI, Data Quality - Not having access to the right kind of data to make AI meaningful.                                                                                       |                                                                                                                                       |                                                    |                                                  |
| 43           | No                                                                                                | Maybe                                              |                                                    |                                                 |                                                 |                                                                  |                                                               |                                                                                                                                                                   |                                                                                                    |                                                                                                 |                                                                                              |                                                                                           |                                                                                  |                                                                                                                |                                                                                                             |                                                                                                                        |                                                                                                                     |                                                                                  |                                                                                                                                                                                                                                                                      |                                                                                                                                       |                                                    |                                                  |
| 44           | Not sure                                                                                          |                                                    |                                                    |                                                 |                                                 |                                                                  |                                                               |                                                                                                                                                                   |                                                                                                    |                                                                                                 |                                                                                              |                                                                                           |                                                                                  |                                                                                                                |                                                                                                             |                                                                                                                        |                                                                                                                     |                                                                                  |                                                                                                                                                                                                                                                                      |                                                                                                                                       |                                                    |                                                  |
| 45           | No                                                                                                | No                                                 |                                                    |                                                 |                                                 |                                                                  |                                                               |                                                                                                                                                                   |                                                                                                    |                                                                                                 |                                                                                              |                                                                                           |                                                                                  |                                                                                                                |                                                                                                             |                                                                                                                        |                                                                                                                     |                                                                                  |                                                                                                                                                                                                                                                                      |                                                                                                                                       |                                                    |                                                  |
| 46           | No                                                                                                | No                                                 |                                                    |                                                 |                                                 |                                                                  |                                                               |                                                                                                                                                                   |                                                                                                    |                                                                                                 |                                                                                              |                                                                                           |                                                                                  |                                                                                                                |                                                                                                             |                                                                                                                        |                                                                                                                     |                                                                                  |                                                                                                                                                                                                                                                                      |                                                                                                                                       |                                                    |                                                  |
| 47           | No                                                                                                | Yes                                                |                                                    |                                                 |                                                 |                                                                  |                                                               |                                                                                                                                                                   |                                                                                                    |                                                                                                 |                                                                                              |                                                                                           |                                                                                  |                                                                                                                |                                                                                                             |                                                                                                                        |                                                                                                                     |                                                                                  |                                                                                                                                                                                                                                                                      |                                                                                                                                       |                                                    |                                                  |
| 48           | No                                                                                                | Yes                                                |                                                    |                                                 |                                                 |                                                                  |                                                               | We plan to investigate how best to implement AI technologies.                                                                                                     | Treatment, Distribution                                                                            |                                                                                                 | Save energy, Integrate with other technologies, Detect leaks                                 |                                                                                           | All of these areas will improve efficiencies in our system and provide benefits. |                                                                                                                |                                                                                                             |                                                                                                                        |                                                                                                                     | All of these areas will improve efficiencies in our system and provide benefits. | Data Availability - Not having enough data to make AI meaningful. Data Quality - Not having access to the right kind of data to make AI meaningful.                                                                                                                  |                                                                                                                                       |                                                    |                                                  |
| 49           | No                                                                                                | Maybe                                              |                                                    |                                                 |                                                 |                                                                  |                                                               |                                                                                                                                                                   | Treatment, Distribution                                                                            |                                                                                                 | Save energy, Save time/labor, Enhance water conservation, Detect leaks                       |                                                                                           |                                                                                  |                                                                                                                |                                                                                                             |                                                                                                                        |                                                                                                                     |                                                                                  | Data Availability - Not having enough data to make AI meaningful. Personnel Skills - Not having staff or consultants who know how to use or manage AI.                                                                                                               |                                                                                                                                       |                                                    |                                                  |
